# Supplementary material for: A novel carbazole derivative containing fluorobenzene unit: aggregation-induced fluorescence emission, polymorphism, mechanochromism and non-reversible thermo-stimulus fluorescence
Source: Royal Society of Chemistry journal article supplement (doi:10.1039/c8ce00025e), 2018-01-01
Supplement: c8ce00025e1.pdf [file c8ce00025e1.pdf]

## Supporting information:

### **A novel carbazole derivative containing fluorobenzene unit: Aggregation-induced fluorescence emission, polymorphism, mechanochromism and non-reversible thermo-stimulus fluorescence**

Huichao Zhu<sup>a</sup>, Shiyin Weng<sup>a</sup>, Hong Zhang<sup>a</sup>, Haizhu Yu<sup>a</sup>, Lin Kong<sup>a</sup>, Yulin Zhong<sup>\*b</sup>, Yupeng Tian<sup>a</sup>, Jiayang Yang<sup>\*a</sup>

<sup>a</sup>College of Chemistry and Chemical Engineering, Anhui University, Anhui Province Key Laboratory of Chemistry for Inorganic/Organic Hybrid Functionalized Materials, Hefei 230601, P. R. China. E-mail: jxyang@ahu.edu.cn

<sup>b</sup>Centre for Clean Environment and Energy, Gold Coast Campus, Griffith University, Gold Coast, QLD 4222, Australia. E-mail: y.zhong@griffith.edu.au.

## Contents:

**Scheme S1** Synthetic routes of compound **3**.

**Table S1** Crystal data and details of collection and refinement of **3Y** and **3O**.

**Fig. S1** <sup>1</sup>H NMR of compound **3Y** (CDCl<sub>3</sub>, 400 MHz)

**Fig. S2** <sup>1</sup>H NMR of compound **3Y** and **3O** (CDCl<sub>3</sub>, 400 MHz)

**Fig. S3** <sup>13</sup>C NMR of compound **3Y** (CDCl<sub>3</sub>, 400 MHz)

**Fig. S4** The absorption spectra for **3Y** and **3O** in the solid state.

**Fig. S5** Lifetime decay curves of **3Y** (a) and **3O** (b).

**Fig. S6** As-experimental and as-simulated XRD patterns for powder **3Y**, **3O** and crystals **3Y**, **3O**.

**Fig. S7** Highest occupied molecular orbital (HOMO), lowest unoccupied molecular orbital (LUMO) diagrams and the energy gap ( $\Delta E$ ) of **3Y** and **3O**

**Fig. S8** Molecular stacks in the crystals of **3O**, (a) structure A, (b) structure B, (c) **3O** viewed from the a-axis.

**Fig. S9** The molecules of **3O** (structure A and B)

**Fig. S10** Molecular stacks in the crystals of **3O**, (a) structure A, (b) structure B, and **3O** (c) viewed from the a-axis.

**Fig. S11** Molecular stacks in the crystals of **3O** viewed from the b-axis (a) and c-axis (b).

**Fig. S12** Cycle behaviors of the maximum emission peaks for **3Y**.

**Fig. S13** The PXRD diagram of **3Y**, heated **3Y** and **3O**.

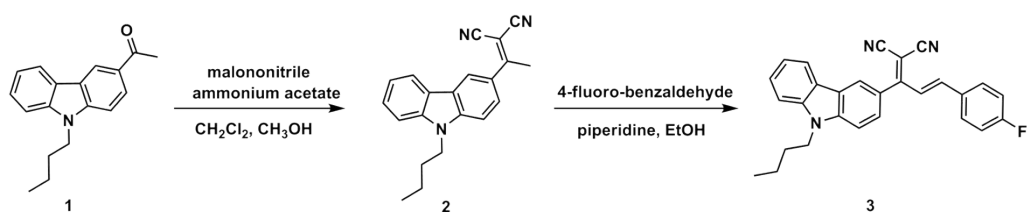

**Scheme S1** Synthetic routes of compound **3**

**Table S1** Crystal data and details of collection and refinement of **3Y** and **3O**.

| Identification code                                 | <b>3Y</b>                                                           | <b>3O</b>                                                           |
|-----------------------------------------------------|---------------------------------------------------------------------|---------------------------------------------------------------------|
| CCDC                                                | 1511130                                                             | 1576277                                                             |
| Empirical formula                                   | C <sub>28</sub> H <sub>22</sub> FN <sub>3</sub>                     | C <sub>28</sub> H <sub>22</sub> FN <sub>3</sub>                     |
| Formula weight                                      | 419.49                                                              | 419.48                                                              |
| Temperature (K)                                     | 296(2)                                                              | 296(2)                                                              |
| Wavelength (Å)                                      | 0.71073                                                             | 0.71073                                                             |
| Crystal system, space group                         | Orthorhombic, <i>P</i> 2 <sub>1</sub> 2 <sub>1</sub> 2 <sub>1</sub> | Monoclinic, <i>P</i> 2 <sub>1</sub> / <i>c</i>                      |
| <i>a</i> (Å)                                        | 8.7593(18)                                                          | 12.758(5)                                                           |
| <i>b</i> (Å)                                        | 13.386(4)                                                           | 14.223(5)                                                           |
| <i>c</i> (Å)                                        | 19.541(4)                                                           | 12.808(5)                                                           |
| $\alpha$ (deg)                                      | 90                                                                  | 90                                                                  |
| $\beta$ (deg)                                       | 90                                                                  | 93.522(4)                                                           |
| $\gamma$ (deg)                                      | 90                                                                  | 90                                                                  |
| Volume (Å <sup>3</sup> )                            | 2291.2(9)                                                           | 2319.8(14)                                                          |
| Z, Calculated density (Mg/m <sup>3</sup> )          | 4, 1.216                                                            | 4, 1.201                                                            |
| Absorption coefficient (mm <sup>-1</sup> )          | 0.078                                                               | 0.077                                                               |
| F(000)                                              | 880                                                                 | 880                                                                 |
| Crystal size (mm)                                   | 0.19 × 0.18 × 0.17                                                  | 0.19 × 0.18 × 0.17                                                  |
| Theta range for data collection (deg)               | 1.84 to 25.00 .                                                     | 1.599 to 24.999                                                     |
| Limiting indices                                    | -10 ≤ <i>h</i> ≤ 10,<br>-15 ≤ <i>k</i> ≤ 15,<br>-21 ≤ <i>l</i> ≤ 23 | -15 ≤ <i>h</i> ≤ 14,<br>-16 ≤ <i>k</i> ≤ 16,<br>-15 ≤ <i>l</i> ≤ 14 |
| Reflections collected / unique                      | 16322 / 4029                                                        | 16199 / 4073                                                        |
| <i>R</i> (int)                                      | 0.0199                                                              | 0.0521                                                              |
| Data / restraints / parameters                      | 4029 / 0 / 291                                                      | 4073 / 23 / 290                                                     |
| Goodness-of-fit on <i>F</i> <sup>2</sup>            | 1.049                                                               | 1.064                                                               |
| Final <i>R</i> indices [ <i>I</i> > 2σ( <i>I</i> )] | <i>R</i> <sub>1</sub> = 0.0395, <i>wR</i> <sub>2</sub> = 0.1048     | <i>R</i> <sub>1</sub> = 0.0879, <i>wR</i> <sub>2</sub> = 0.2700     |
| <i>R</i> indices (all data)                         | <i>R</i> <sub>1</sub> = 0.0458, <i>wR</i> <sub>2</sub> = 0.1106     | <i>R</i> <sub>1</sub> = 0.1019, <i>wR</i> <sub>2</sub> = 0.2873     |

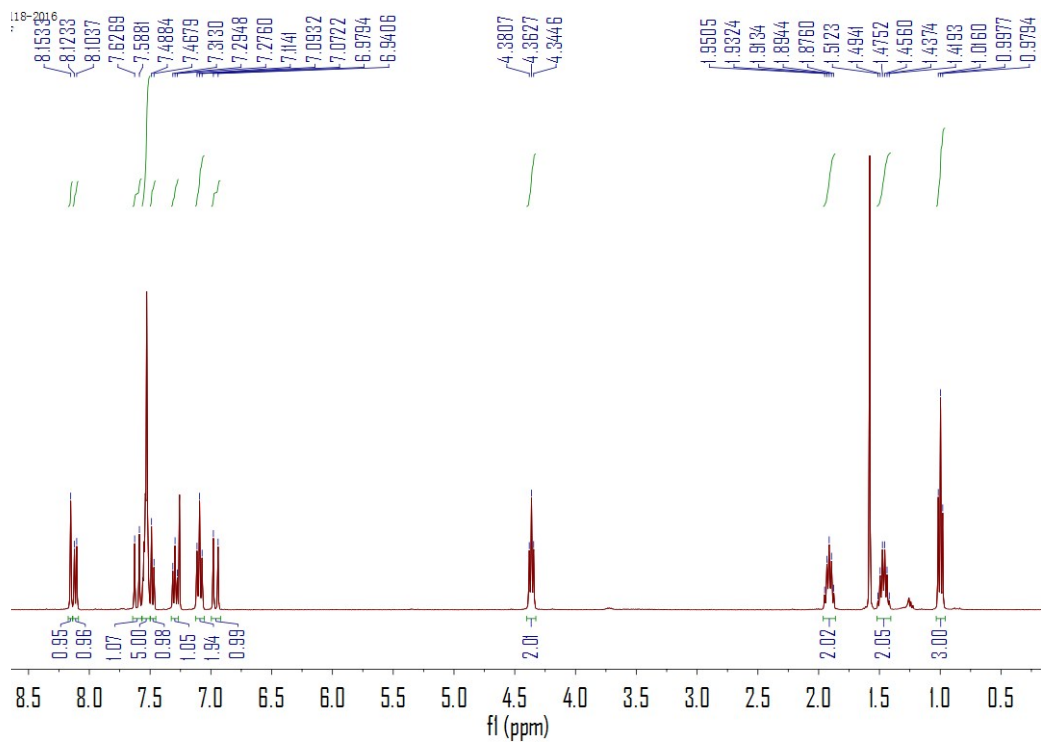

Fig. S1  $^1\text{H}$  NMR of compound **3** ( $\text{CDCl}_3$ , 400 MHz)

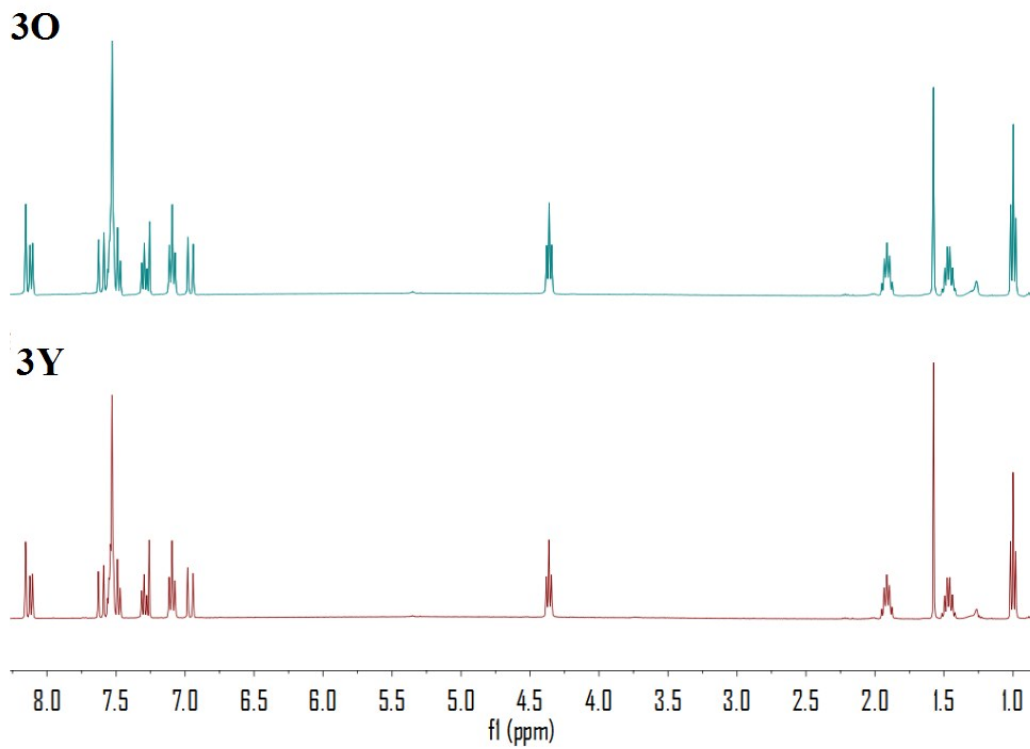

Fig. S2  $^1\text{H}$  NMR of compound **3Y** and **3O** ( $\text{CDCl}_3$ , 400 MHz)

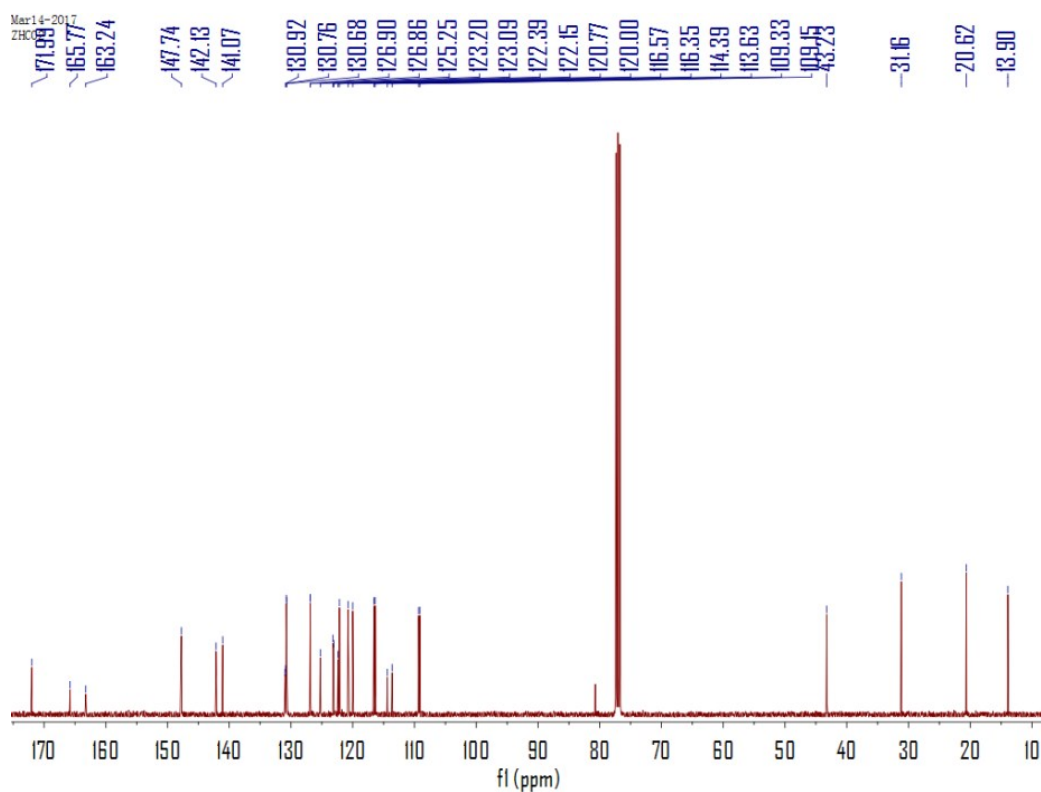

Fig. S3  $^{13}\text{C}$  NMR of compound **3Y** ( $\text{CDCl}_3$ , 400 MHz).

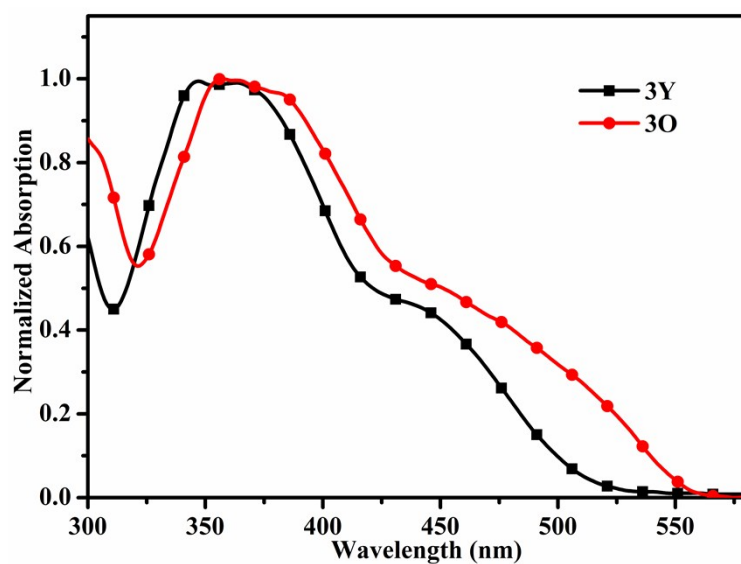

Fig. S4 The absorption spectra for **3Y** and **3O** in the solid state.

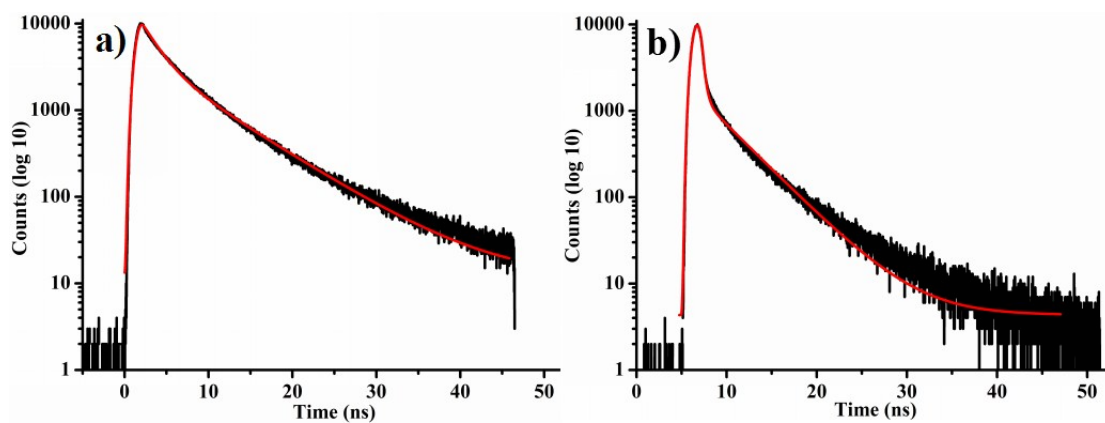

Fig. S5 Lifetime decay curves of **3Y** (a) and **3O** (b).

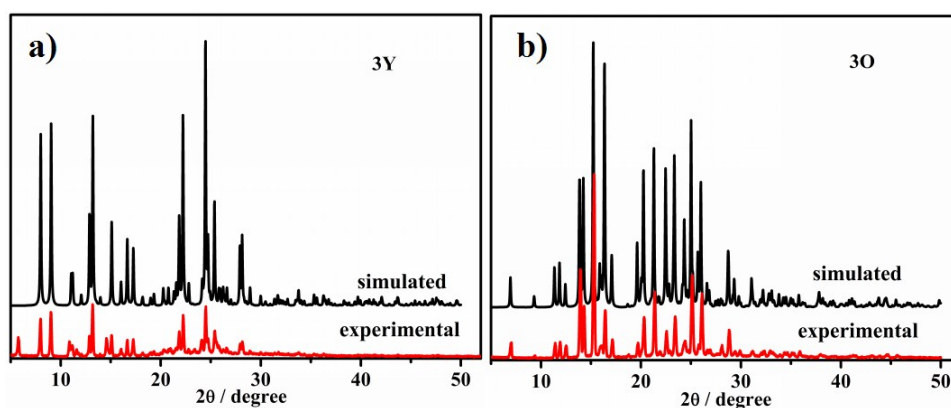

Fig. S6 As-experimental and as-simulated XRD patterns for powder **3Y**, **3O** and crystals **3Y**, **3O**.

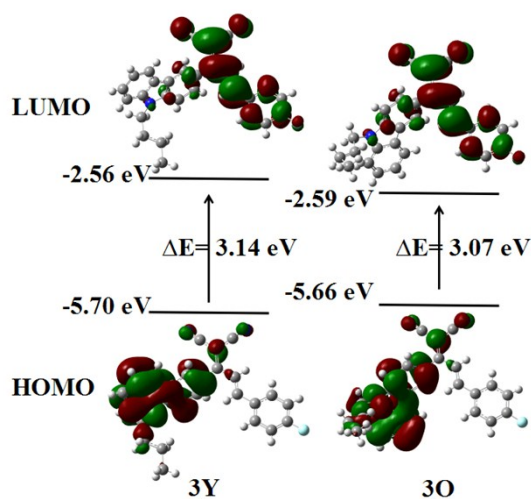

Fig S7 Highest occupied molecular orbital (HOMO), lowest unoccupied molecular orbital (LUMO) diagrams and the energy gap ( $\Delta E$ ) of **3Y** and **3O**

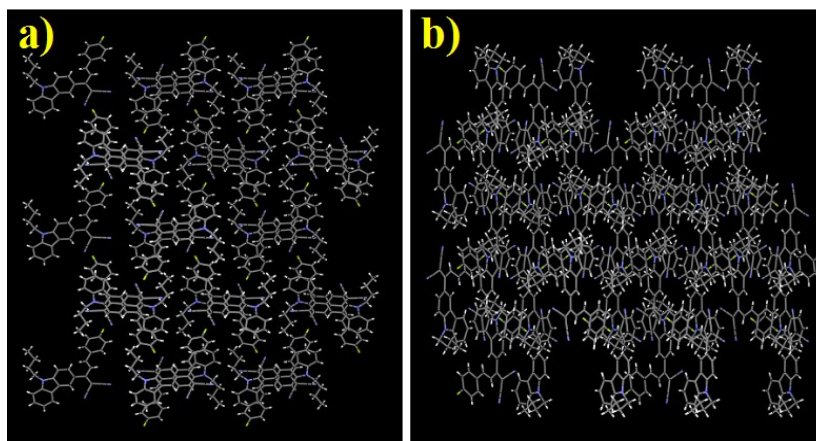

**Fig. S8** Molecular stacks in the crystals of **3Y** viewed from the a-axis (a) and c-axis (b).

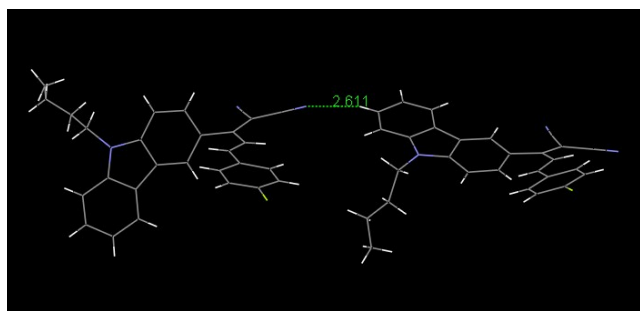

**Fig. S9** The molecules of **3O** (structure A and B)

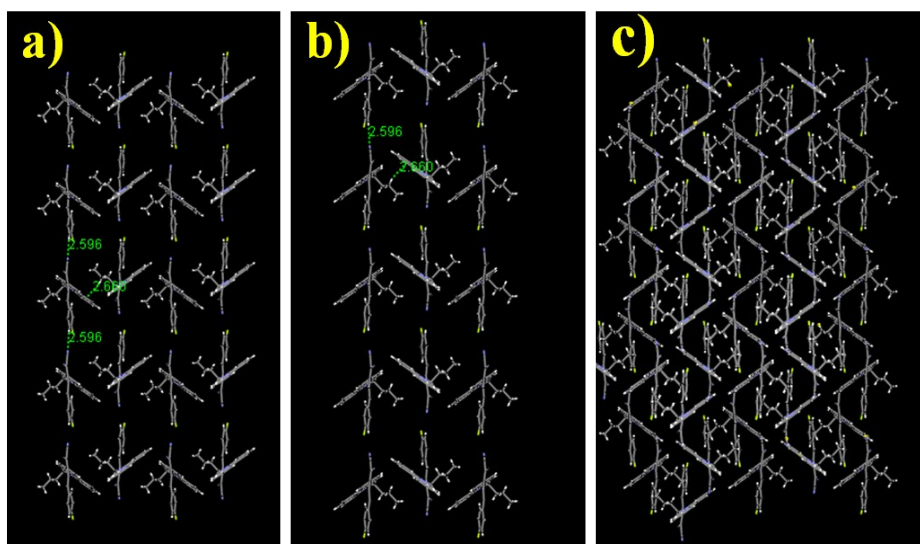

**Fig. S10** Molecular stacks in the crystals of **3O**, (a) structure A, (b) structure B, and **3O** (c) viewed from the a-axis.

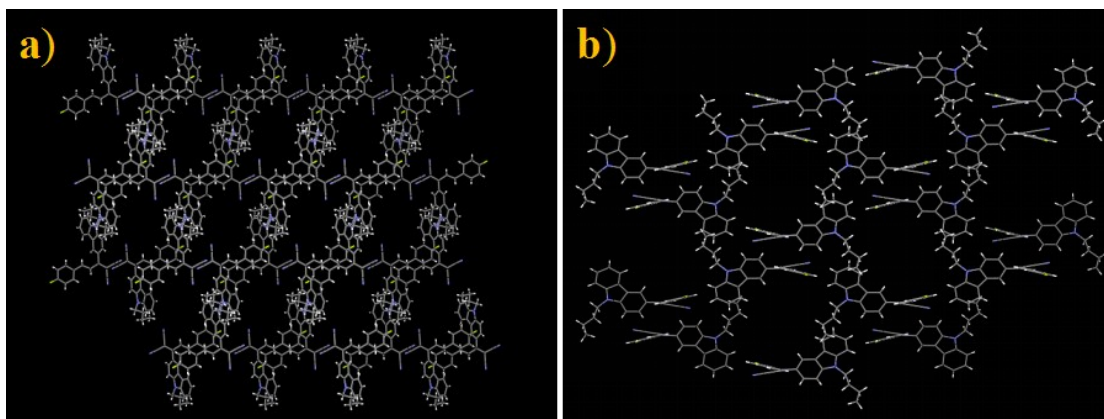

**Fig. S11** Molecular stacks in the crystals of **3O** viewed from the b-axis (a) and c-axis (b).

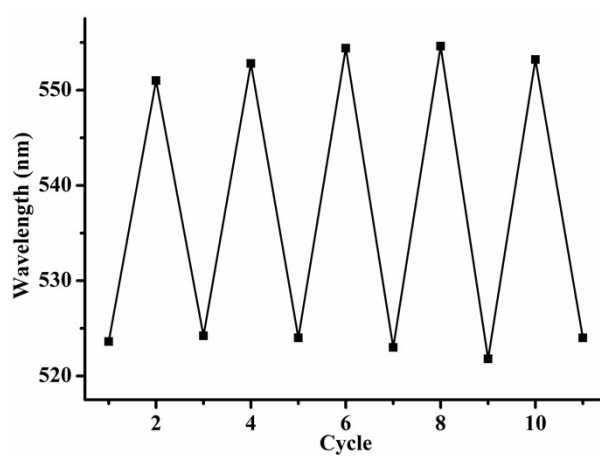

**Fig. S12** Cycle behaviors of the maximum emission peaks for **3Y**.

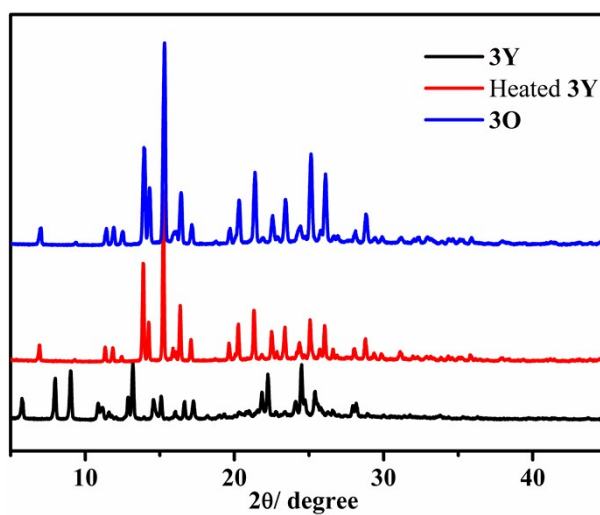

**Fig. S13** The PXRD diagram of **3Y**, heated **3Y** and **3O**.
